# Supplementary material for: Spontaneous resolution of RS-fluoxetine through tetrafluoroborate conglomerate salt and racemic kryptoracemate formation via the sulfate ion
Source: Royal Society of Chemistry journal article supplement (doi:10.1039/d4ce00643g), 2024-01-01
Supplement: d4ce00643g1.pdf [file d4ce00643g1.pdf]

## SUPPORTING INFORMATION

### Spontaneous resolution of RS-Fluoxetine through tetrafluoroborate conglomerate salt and the racemic kryptoracemate formation via sulfate one.

*Paulo S. Carvalho Jr<sup>a</sup>, Luan F. Diniz<sup>b</sup>, Christian Fernandes<sup>b</sup>*

<sup>a</sup>Institute of Physics, Federal University of Mato Grosso do Sul, 79070-900, Campo Grande, MS, Brazil. \*e-mail: [paulo.sousa@ufms.br](mailto:paulo.sousa@ufms.br).

<sup>b</sup>Faculty of Pharmacy, Federal University of Minas Gerais, 31270-901, Belo Horizonte, Brazil.

### COMPLEMENTARY FIGURES AND TABLES

**Figure S1.** Representative outcomes from the crystallization of Fluoxetine (Flx) with various inorganic and organic salt formers investigated in this study. Shown are oil phases and a degradation phase.

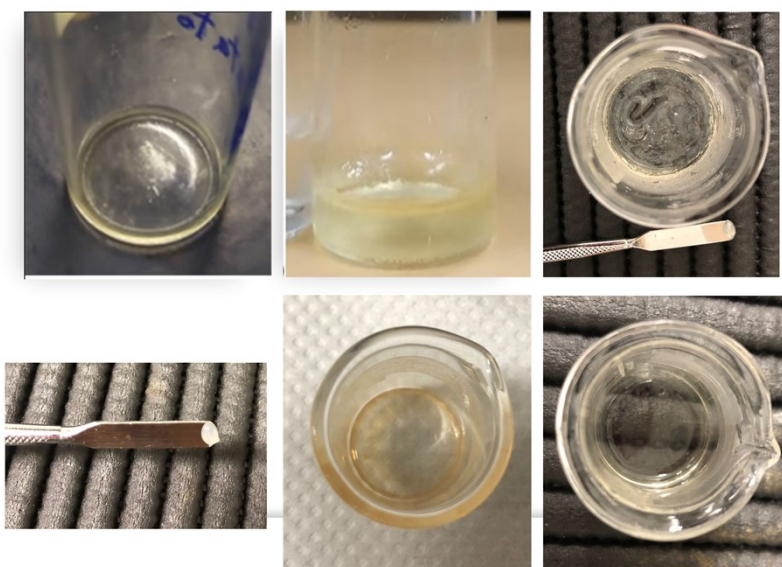

**Figure S2.** Asymmetric unit of Flx-SO4-h. The water molecules are incorporated in the Flx-SO4-*h* structure H-bonded to Flx-enantiomers.

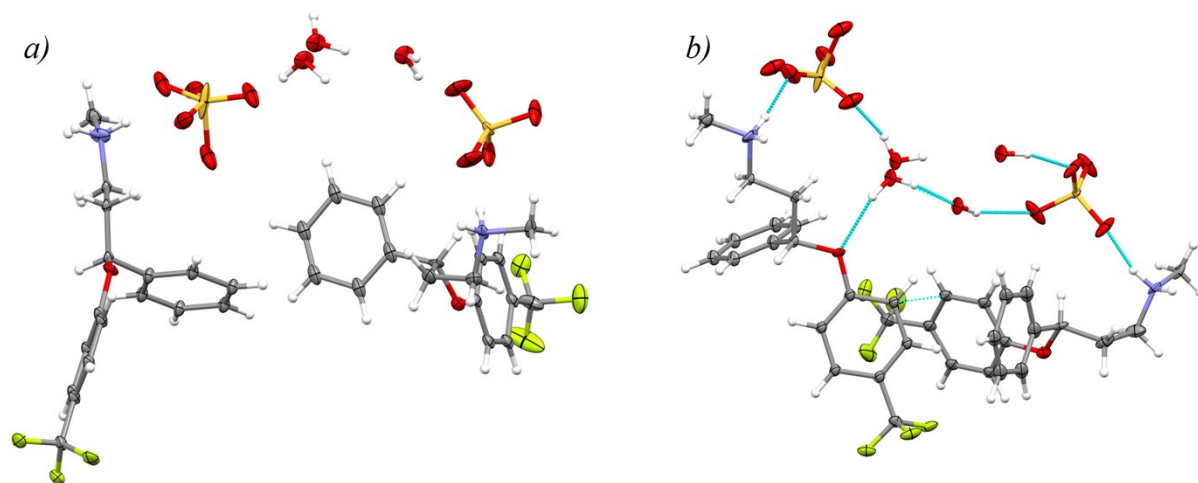

**Figure S3.** Racemic chains of the ionic unit of Flx-SO<sub>4</sub>. The R- (in blue) and S-Flx (in red) are alternately arranged along the motif.

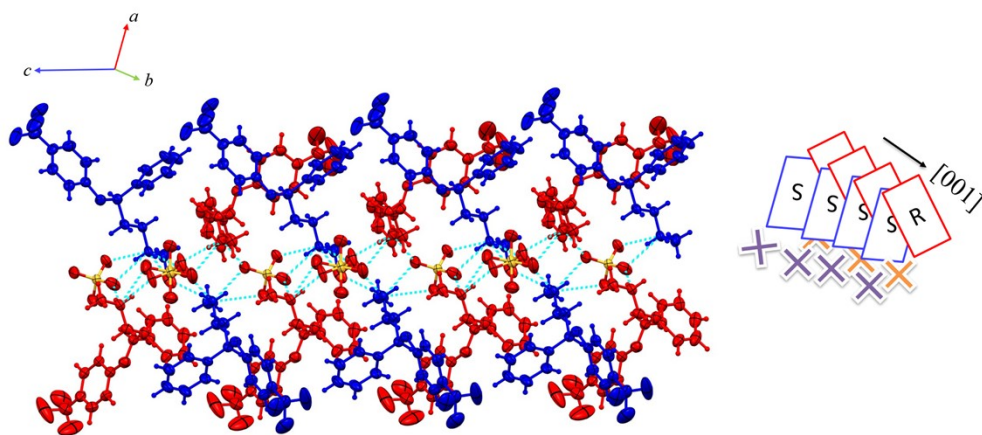

**Figure S4.** Crystal of Flx-BF<sub>4</sub> obtained by (a) protonation of the racemic Flx free base or (b) AE methods.

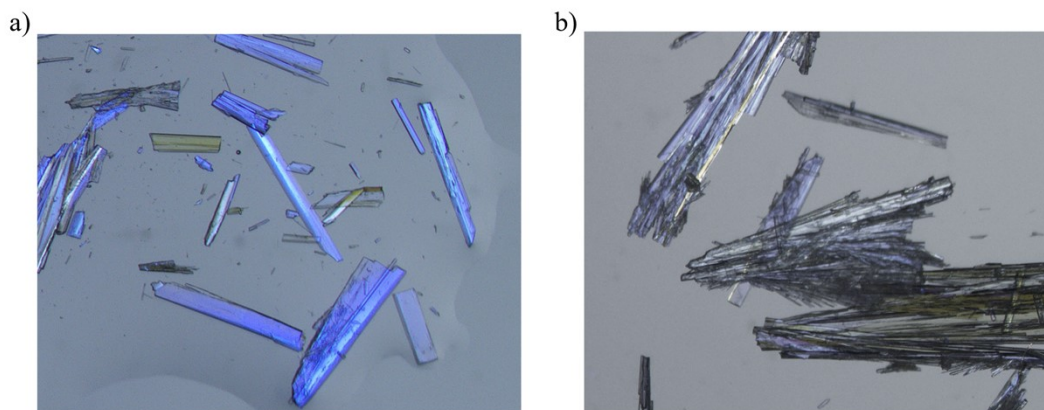

**Figure S5.** Diffractograms overlay for a freshly prepared sample of Flx-BF<sub>4</sub> and from the solid residue remaining after the solubility study.

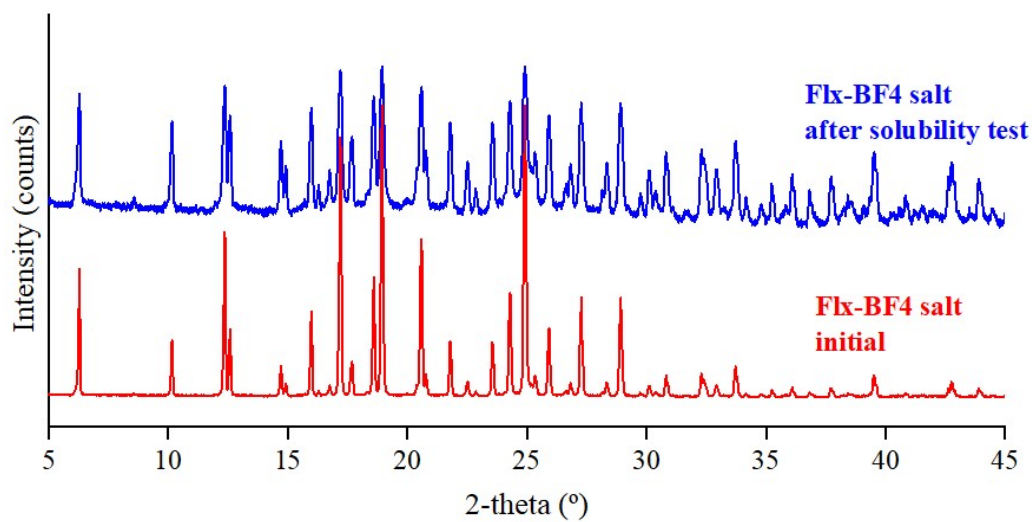

**Figure S6.** Integration of the Flx enantiomers (R- and S-) peaks using (a) automatic integration of Waters-Empower software, and (b) after deconvolution through the Origin program. In both integration strategies, the peak areas correspond to approximately 50%.

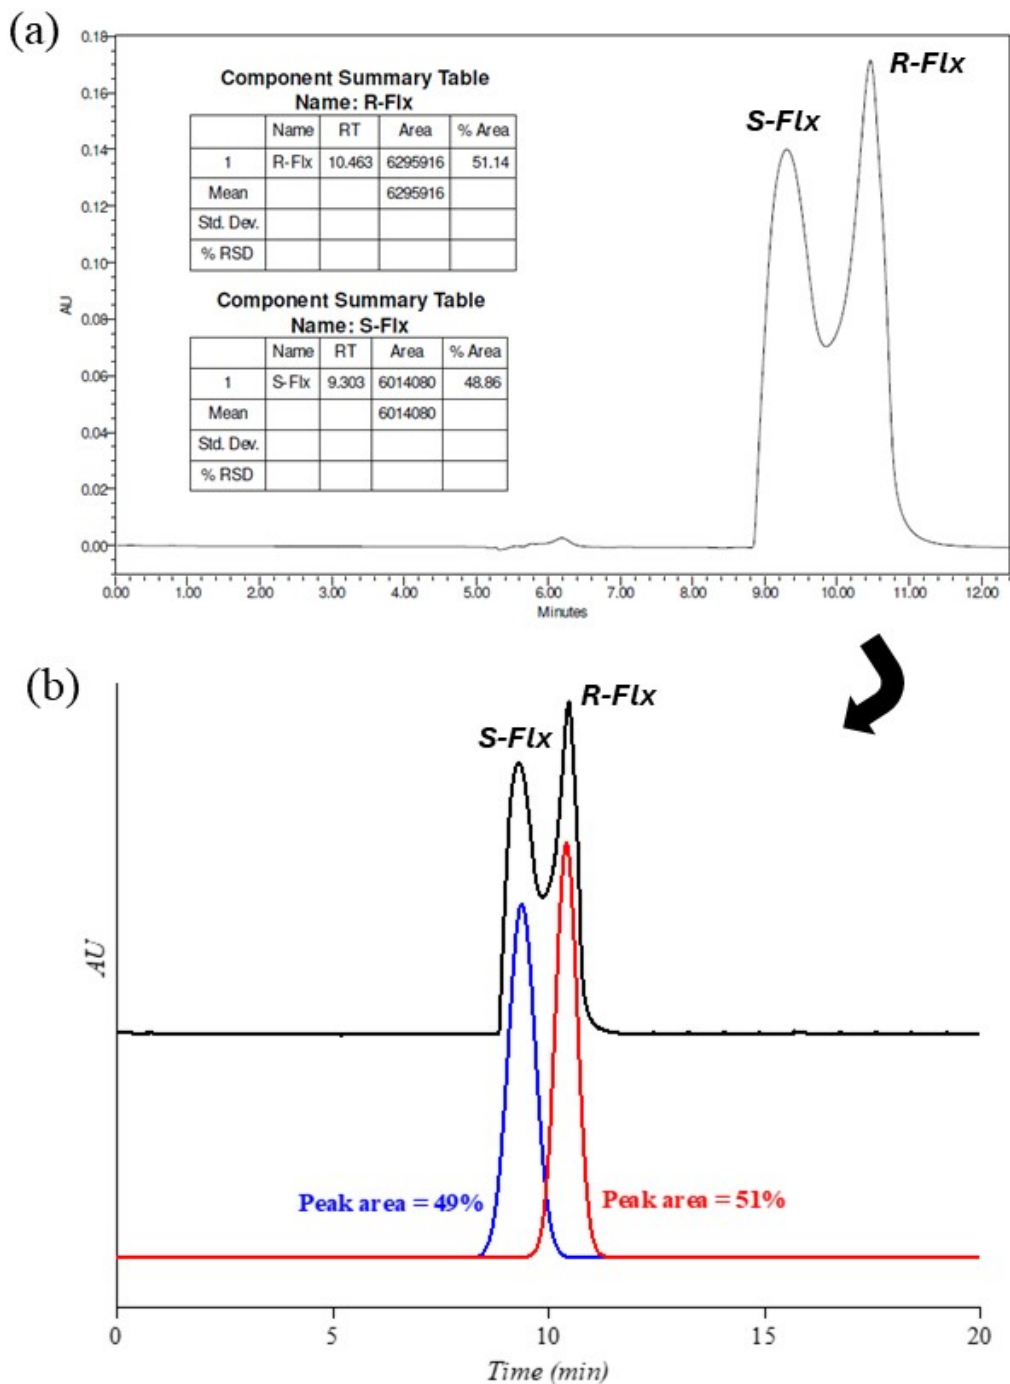

**Table 1.** Crystallographic data of FlxBF<sub>4</sub> collected using Cu K $\alpha$  radiation (1.54184 Å). Data collection was collected at 100K on Bruker X8 Proteum diffractometer. 7

| Flx-BF <sub>4</sub>                                          |                                                                              |
|--------------------------------------------------------------|------------------------------------------------------------------------------|
| Empirical formula                                            | C <sub>17</sub> H <sub>19</sub> BF <sub>7</sub> NO                           |
| Formula weight                                               | 397.14                                                                       |
| Temperature/K                                                | 100.0                                                                        |
| Crystal system                                               | Orthorhombic                                                                 |
| Space group                                                  | <i>P</i> 2 <sub>1</sub> 2 <sub>1</sub> 2 <sub>1</sub>                        |
| <i>a</i> /Å                                                  | 6.0816(3)                                                                    |
| <i>b</i> /Å                                                  | 10.8836(5)                                                                   |
| <i>c</i> /Å                                                  | 27.6129(13)                                                                  |
| Volume/Å <sup>3</sup>                                        | 1827.69(15)                                                                  |
| <i>Z</i> , <i>Z</i> '                                        | 4, 1                                                                         |
| $\rho_{\text{calc}}$ /g/cm <sup>3</sup>                      | 1.443                                                                        |
| $\mu$ /mm <sup>-1</sup>                                      | 1.214                                                                        |
| F(000)                                                       | 816.0                                                                        |
| Crystal size/mm <sup>3</sup>                                 | 0.40 × 0.177 × 0.07                                                          |
| Radiation                                                    | CuK $\alpha$ ( $\lambda$ = 1.54178)                                          |
| 2 $\Theta$ range for collection/°                            | 6.402 to 144.594                                                             |
| Index ranges                                                 | -7 ≤ <i>h</i> ≤ 7<br>-13 ≤ <i>k</i> ≤ 13<br>-31 ≤ <i>l</i> ≤ 33              |
| Reflections collected                                        | 65291                                                                        |
| Independent reflections                                      | 3550 [ <i>R</i> <sub>int</sub> = 0.0316, <i>R</i> <sub>sigma</sub> = 0.0113] |
| Data/restraints/parameters                                   | 3550/0/245                                                                   |
| Goodness-of-fit on F <sup>2</sup>                            | 1.093                                                                        |
| Final <i>R</i> indexes [ <i>I</i> ≥ 2 $\sigma$ ( <i>I</i> )] | <i>R</i> <sub>1</sub> = 0.0409, <i>wR</i> <sub>2</sub> = 0.1006              |
| Final <i>R</i> indexes [all data]                            | <i>R</i> <sub>1</sub> = 0.0428, <i>wR</i> <sub>2</sub> = 0.1040              |
| Largest diff. peak/hole / e Å <sup>-3</sup>                  | 0.21/-0.27                                                                   |
| Flack parameter                                              | 0.411(19)                                                                    |
